# Supplementary material
Source: PubMed Central journal article supplement (PMC1635120)
Supplement: pnas_0607423103_3.pdf [file pnas_0607423103_3.pdf]

# APPENDIX

## Beers/Appel/Simpson/Henkel (BASH) Mouse ALS Score\*

0 = Healthy

1 = Tremulousness

2 = Gait Abnormalities

- waddle
- lower hindquarters
- limp tail

3 = Hindlimb Weakness/Paresis

- foot drag
- trouble with hindlimb extension

4 = Weight Loss

- $\geq 10\%$  loss of maximum weight

5 = Spasticity

- one or both hindlimbs spastic
- incontinence

6 = Paralysis

- one or both hindlimb paralyzed

AND

- able to ambulate around cage with forelimbs

7 = End Stage

- inability to ambulate around cage

8 = Euthanasia

\*Stages of disease progression. Shown are the criteria used to score mSOD1<sup>G93A</sup>/ PU.1<sup>+/+</sup>, mSOD1<sup>G93A</sup>/PU.1<sup>+/-</sup>, or mSOD1<sup>G93A</sup>/PU.1<sup>-/-</sup> mice as they develop an ALS-like disease.
