# Supplementary material
Source: PubMed Central journal article supplement (PMC1635120)

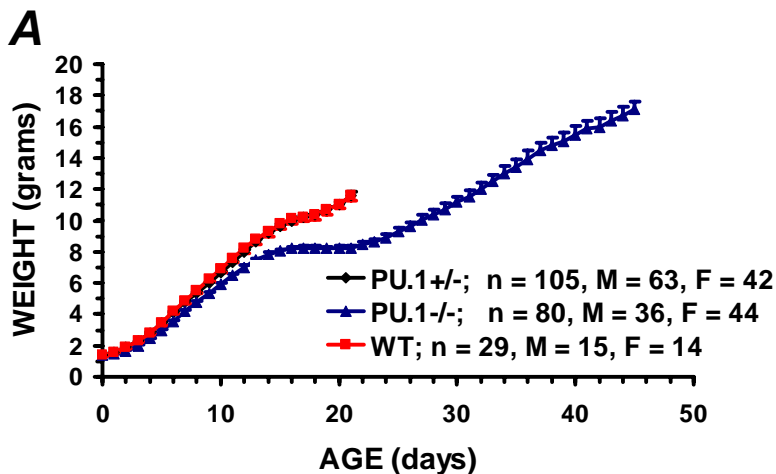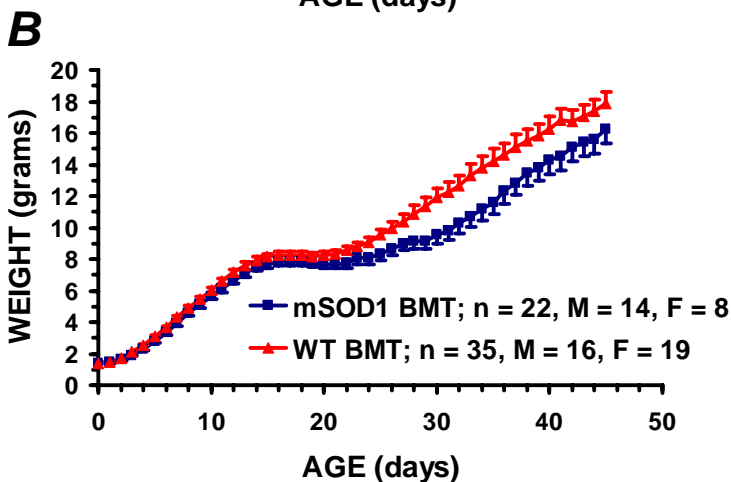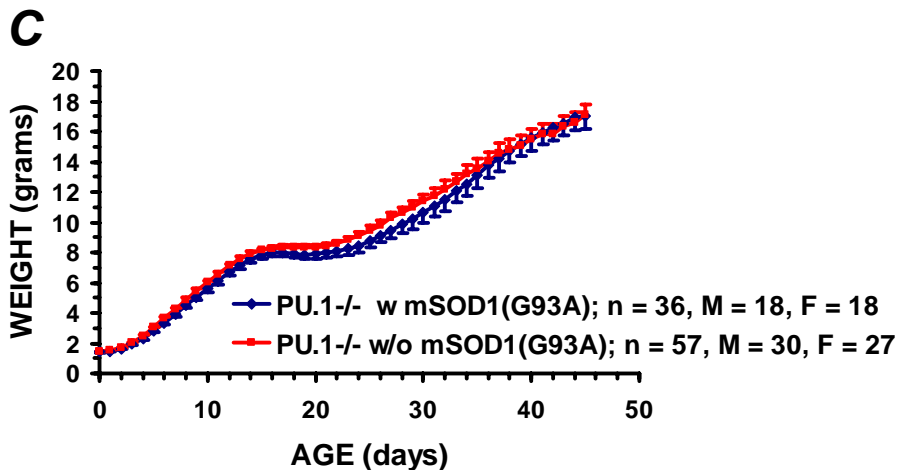

Supplement: pnas_0607423103_1.pdf [file pnas_0607423103_1.pdf]

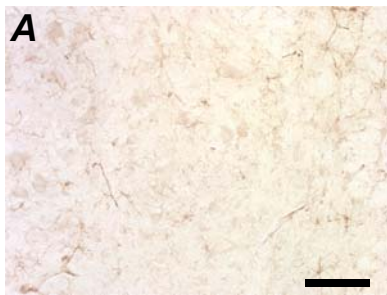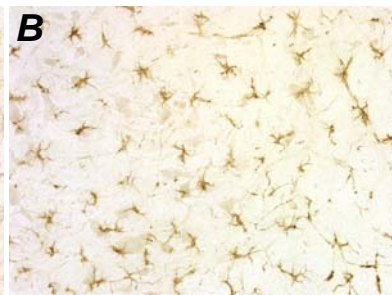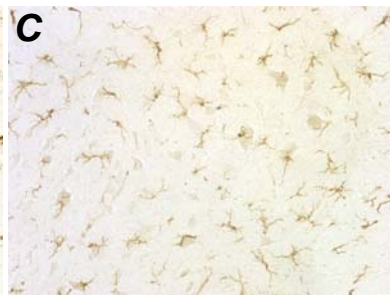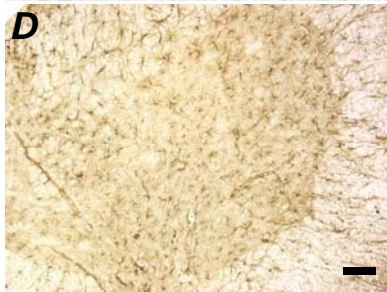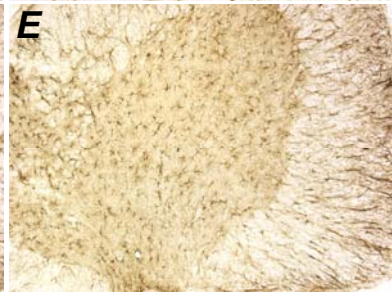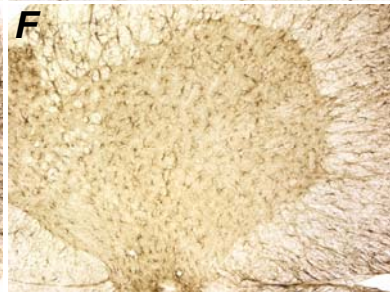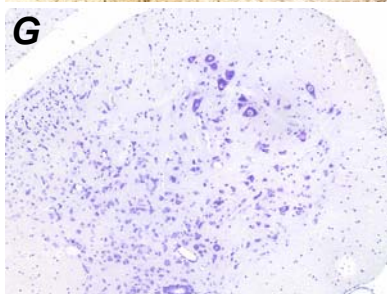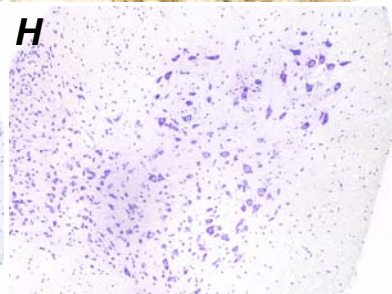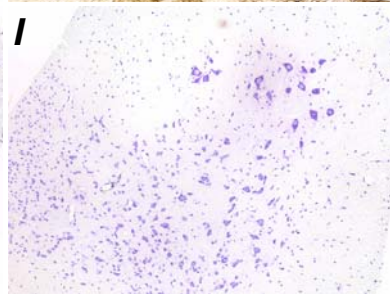

Supplement: pnas_0607423103_2.pdf [file pnas_0607423103_2.pdf]
